# Supplementary material for: CRISPR screens reveal convergent targeting strategies against evolutionarily distinct chemoresistance in cancer
Source: PubMed Central journal article supplement (PMC11217446; doi:10.1038/s41467-024-49673-4), 2024-06-29
Supplement: 41467_2024_49673_MOESM9_ESM.pdf [file 41467_2024_49673_MOESM9_ESM.pdf]

## **Description of Additional Supplementary Files**

File Name: Supplementary Data 1

Description: First-round genome-scale CRISPR screen data.

File Name: Supplementary Data 2

Description: RNA-seq data for chemoresistant cells.

File Name: Supplementary Data 3

Description: Druggable gene library for CRISPR knockout screening.

File Name: Supplementary Data 4

Description: Second-round druggable gene library CRISPR screen data.

File Name: Supplementary Data 5

Description: RNA-seq data for PLK4 target genes.

File Name: Supplementary Data 6

Description: Oligonucleotides and primer sequences.
